# Supplementary material for: Biochemical Differences in Cerebrospinal Fluid between Secondary Progressive and Relapsing–Remitting Multiple Sclerosis
Source: MDPI journal article supplement (doi:10.3390/cells8020084), 2019-01-24
Supplement: s1 [file s1]

## Biochemical differences in cerebrospinal fluid between secondary progressive and relapsing-remitting multiple sclerosis

Stephanie Herman, Torbjörn Åkerfeldt, Ola Spjuth, Joachim Burman, Kim Kultima

**Table S1.** Non-default parameter values used for pre-processing in KNIME. For all parameters not mentioned, the default values were used.

| Parameter                       | Value |
|---------------------------------|-------|
| <i>FeatureFinderMetabo</i>      |       |
| chrom_peak_snr                  | 2.0   |
| min_trace_length                | 1.0   |
| isotope_filtering_model         | None  |
| report_convex_hulls             | true  |
| <i>FeatureLinkerUnlabeledQT</i> |       |
| nr_partitions                   | 10    |
| ignore_charge                   | true  |
| max_difference (distance_RT)    | 10.0  |
| max_difference (distance_MZ)    | 5.0   |
| unit                            | ppm   |

**Table S2.** Complete results from the pathway analysis based on the altered metabolites in SPMS compared with RRMS patients.

| Pathway                                           | Coverage | p-value              | FDR   | Impact |
|---------------------------------------------------|----------|----------------------|-------|--------|
| Aminoacyl-tRNA biosynthesis                       | 6/56     | $4.2 \times 10^{-4}$ | 0.034 | 0      |
| Phenylalanine metabolism                          | 4/45     | $2.9 \times 10^{-3}$ | 0.103 | 0.173  |
| Tryptophan metabolism                             | 5/79     | $3.9 \times 10^{-3}$ | 0.103 | 0.146  |
| Valine, leucine & isoleucine biosynthesis         | 3/27     | $5.5 \times 10^{-3}$ | 0.110 | 0.052  |
| Pyrimidine metabolism                             | 4/60     | $8.3 \times 10^{-3}$ | 0.133 | 0.088  |
| Nitrogen metabolism                               | 3/39     | 0.015                | 0.188 | 0      |
| Valine, leucine & isoleucine degradation          | 3/40     | 0.016                | 0.188 | 0.042  |
| Purine metabolism                                 | 4/92     | 0.035                | 0.350 | 0.018  |
| Phenylalanine, tyrosine & tryptophan biosynthesis | 2/27     | 0.052                | 0.459 | 0.008  |
| Tyrosine metabolism                               | 3/76     | 0.084                | 0.629 | 0.103  |
| Arginine & proline metabolism                     | 3/77     | 0.087                | 0.629 | 0.017  |
| D-Glutamine & D-glutamate metabolism              | 1/11     | 0.141                | 0.941 | 0.027  |
| Cysteine & methionine                             | 2/56     | 0.178                | 1     | 0.053  |
| Sulfur metabolism                                 | 1/18     | 0.221                | 1     | 0.071  |
| Caffeine metabolism                               | 1/21     | 0.253                | 1     | 0.184  |
| Thiamine metabolism                               | 1/24     | 0.283                | 1     | 0      |
| Alanine, aspartate & glutamate metabolism         | 1/24     | 0.283                | 1     | 0.207  |

|                                                   |       |       |   |                      |
|---------------------------------------------------|-------|-------|---|----------------------|
| Pantothenate & CoA biosynthesis                   | 1/27  | 0.313 | 1 | 0                    |
| Propanoate metabolism                             | 1/35  | 0.385 | 1 | 0                    |
| Ubiquinone & other terpenoid-quinone biosynthesis | 1/36  | 0.394 | 1 | 0                    |
| Nicotinate & nicotinamide metabolism              | 1/44  | 0.458 | 1 | 0                    |
| Lysine degradation                                | 1/47  | 0.481 | 1 | 5.0×10 <sup>-4</sup> |
| Porphyrin & chlorophyll metabolism                | 1/104 | 0.770 | 1 | 0.018                |

**Table S3.** Complete results from the pathway analysis based on the altered metabolites in SPMS patients compared with controls.

| Pathway                                             | Coverage | p-value              | FDR   | Impact |
|-----------------------------------------------------|----------|----------------------|-------|--------|
| Tryptophan metabolism                               | 5/79     | 1.5×10 <sup>-3</sup> | 0.123 | 0.159  |
| Phenylalanine metabolism                            | 3/45     | 0.013                | 0.522 | 0.054  |
| Caffeine metabolism                                 | 2/21     | 0.022                | 0.595 | 0.184  |
| Ubiquinone and other terpenoid-quinone biosynthesis | 2/36     | 0.060                | 1     | 0.101  |
| Lysine degradation                                  | 2/47     | 0.096                | 1     | 0.006  |
| Pyrimidine metabolism                               | 2/60     | 0.144                | 1     | 0.045  |
| Sulfur metabolism                                   | 1/18     | 0.184                | 1     | 0.071  |
| Tyrosine metabolism                                 | 2/76     | 0.209                | 1     | 0.094  |
| Arginine & proline metabolism                       | 2/77     | 0.213                | 1     | 0.023  |
| Valine, leucine & isoleucine biosynthesis           | 1/27     | 0.264                | 1     | 0.025  |
| Purine metabolism                                   | 2/92     | 0.276                | 1     | 0.008  |
| Vitamin B6 metabolism                               | 1/32     | 0.305                | 1     | 0.060  |
| Valine, leucine & isoleucine degradation            | 1/40     | 0.366                | 1     | 0.042  |
| Nicotinate & nicotinamide metabolism                | 1/44     | 0.394                | 1     | 0      |
| Cysteine & methionine metabolism                    | 1/56     | 0.472                | 1     | 0.015  |
